# Supplementary figures and images for: Identification of Novel Tumor Pyroptosis-Related Antigens and Pyroptosis Subtypes for Developing mRNA Vaccines in Pancreatic Adenocarcinoma
Source: MDPI journal article supplement (doi:10.3390/biomedicines12040726), 2024-03-25

A

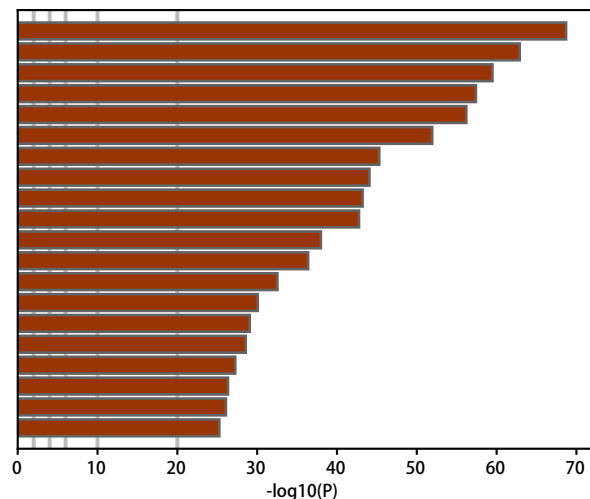

B

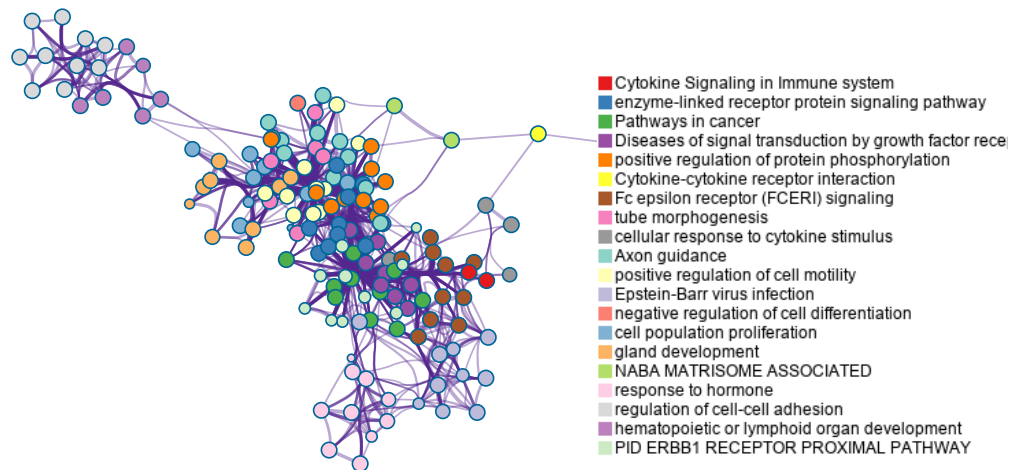

Supplement: s1 [file s1]

A

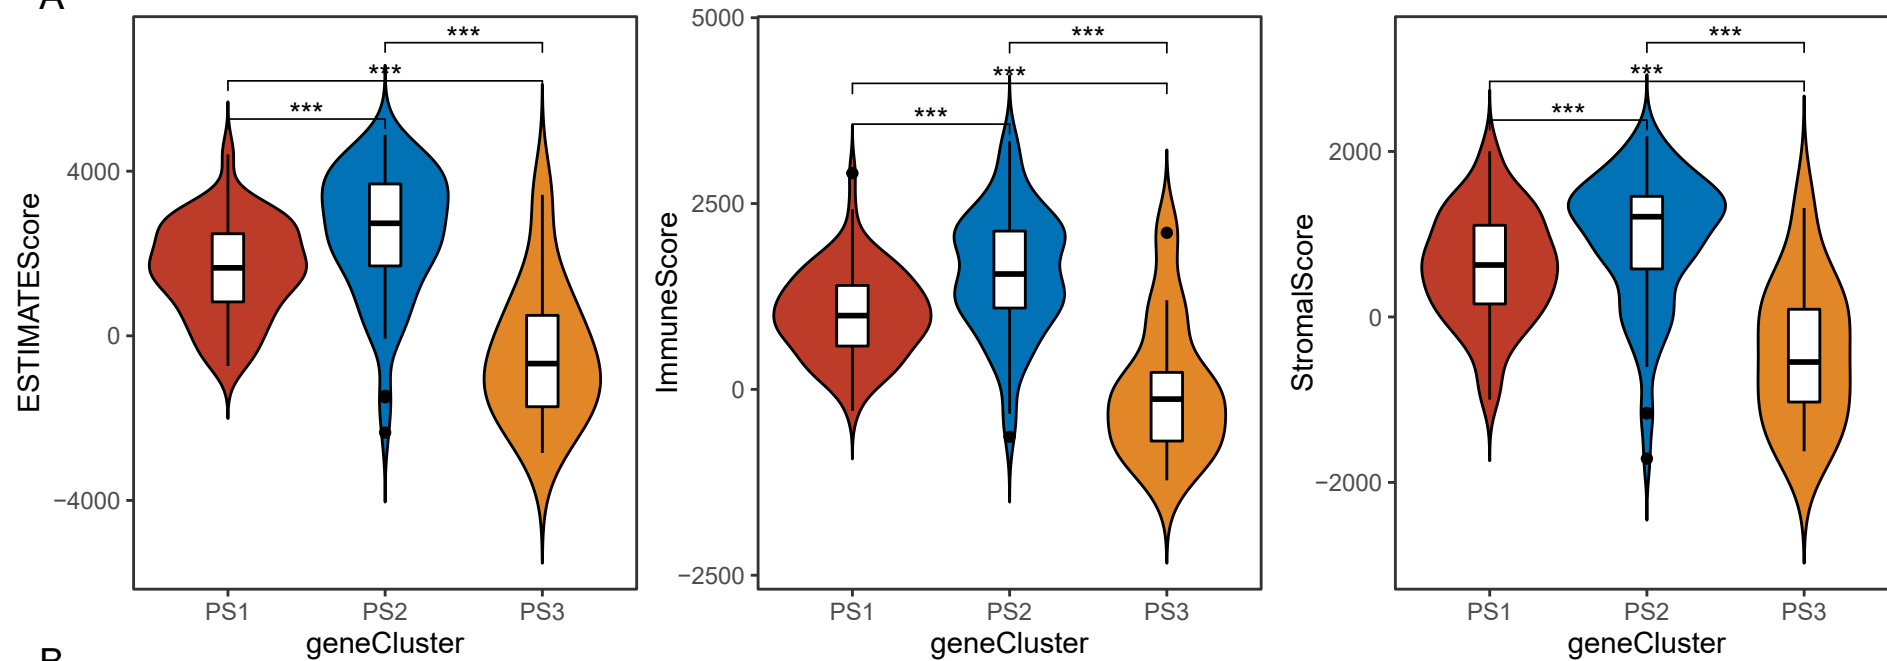

B

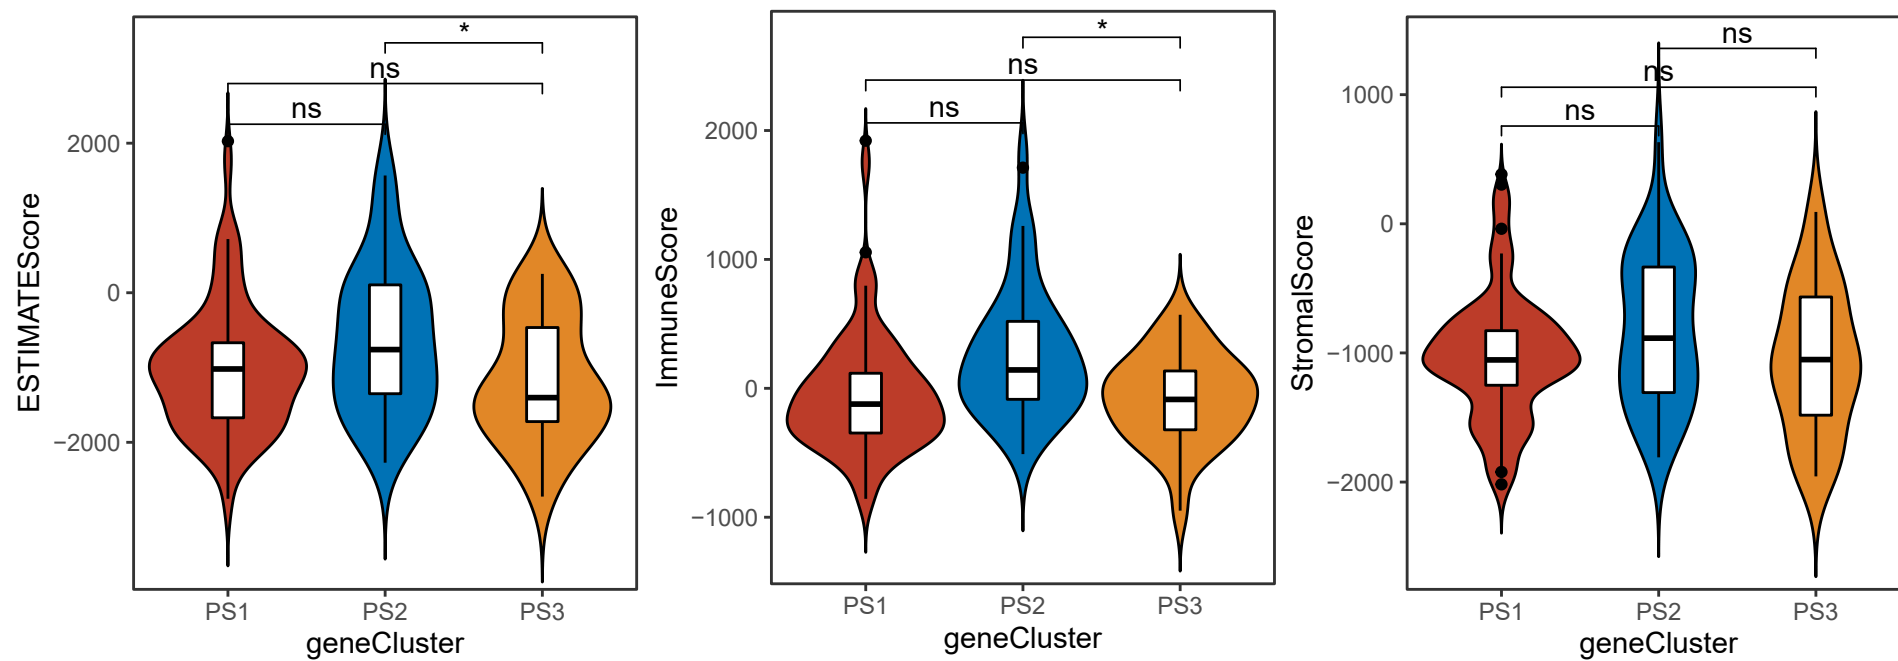

Supplement: s1 [file s1]

A

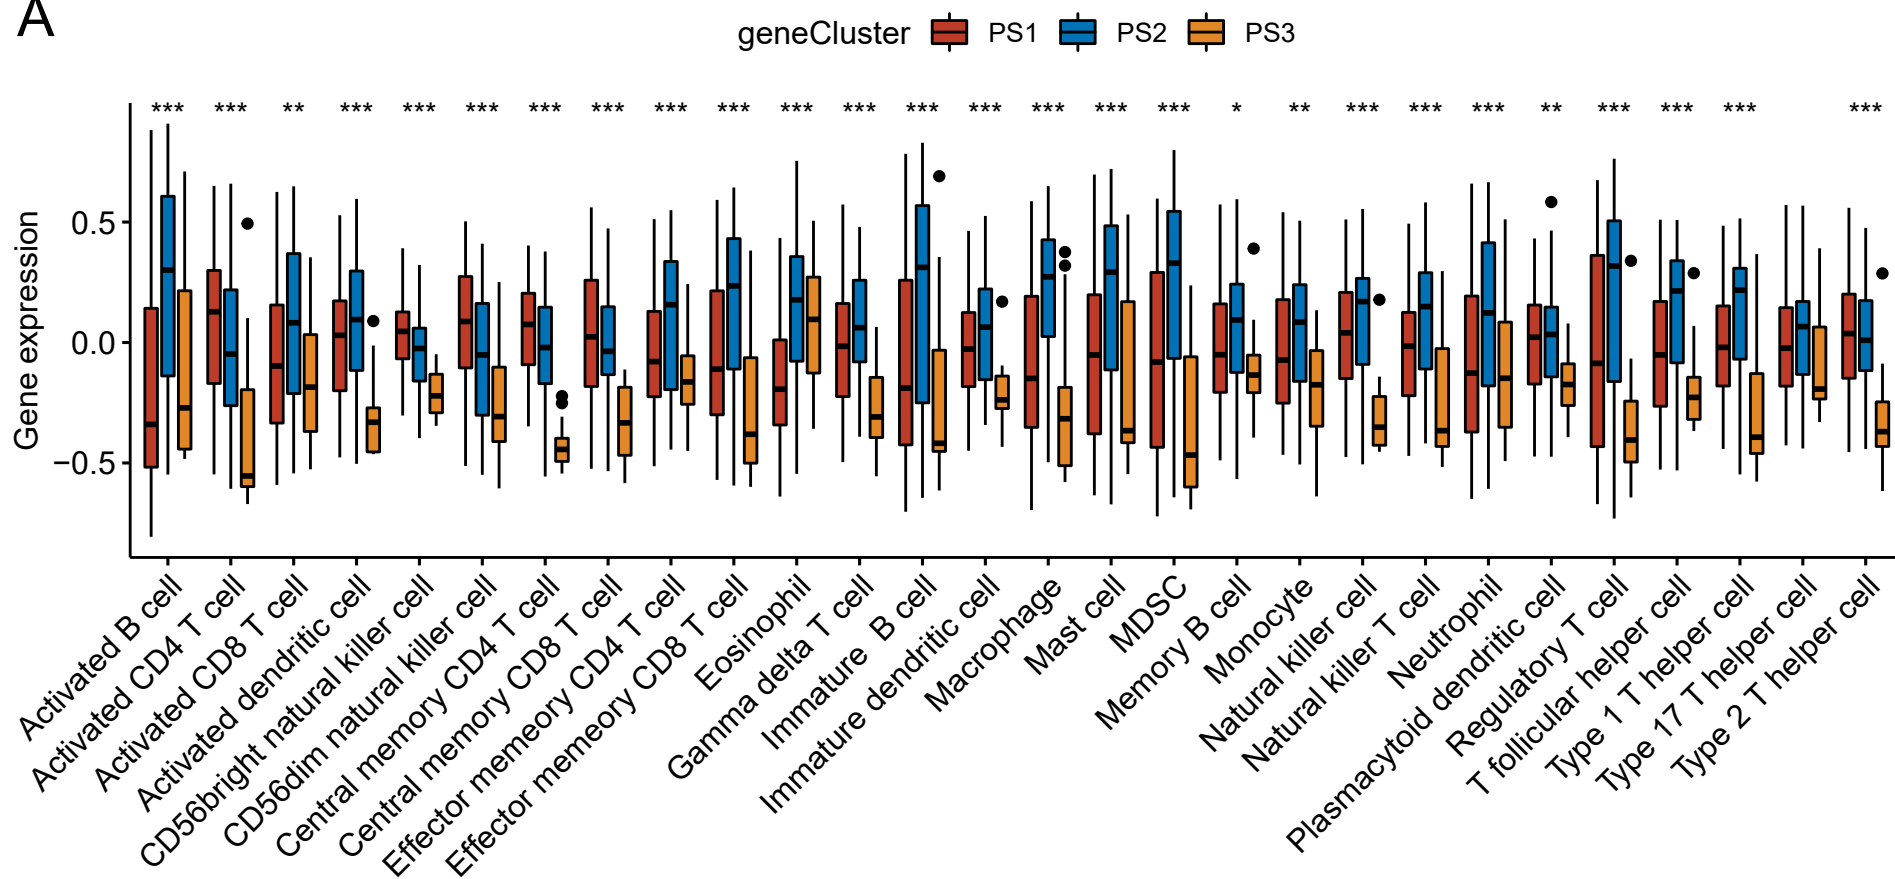

B

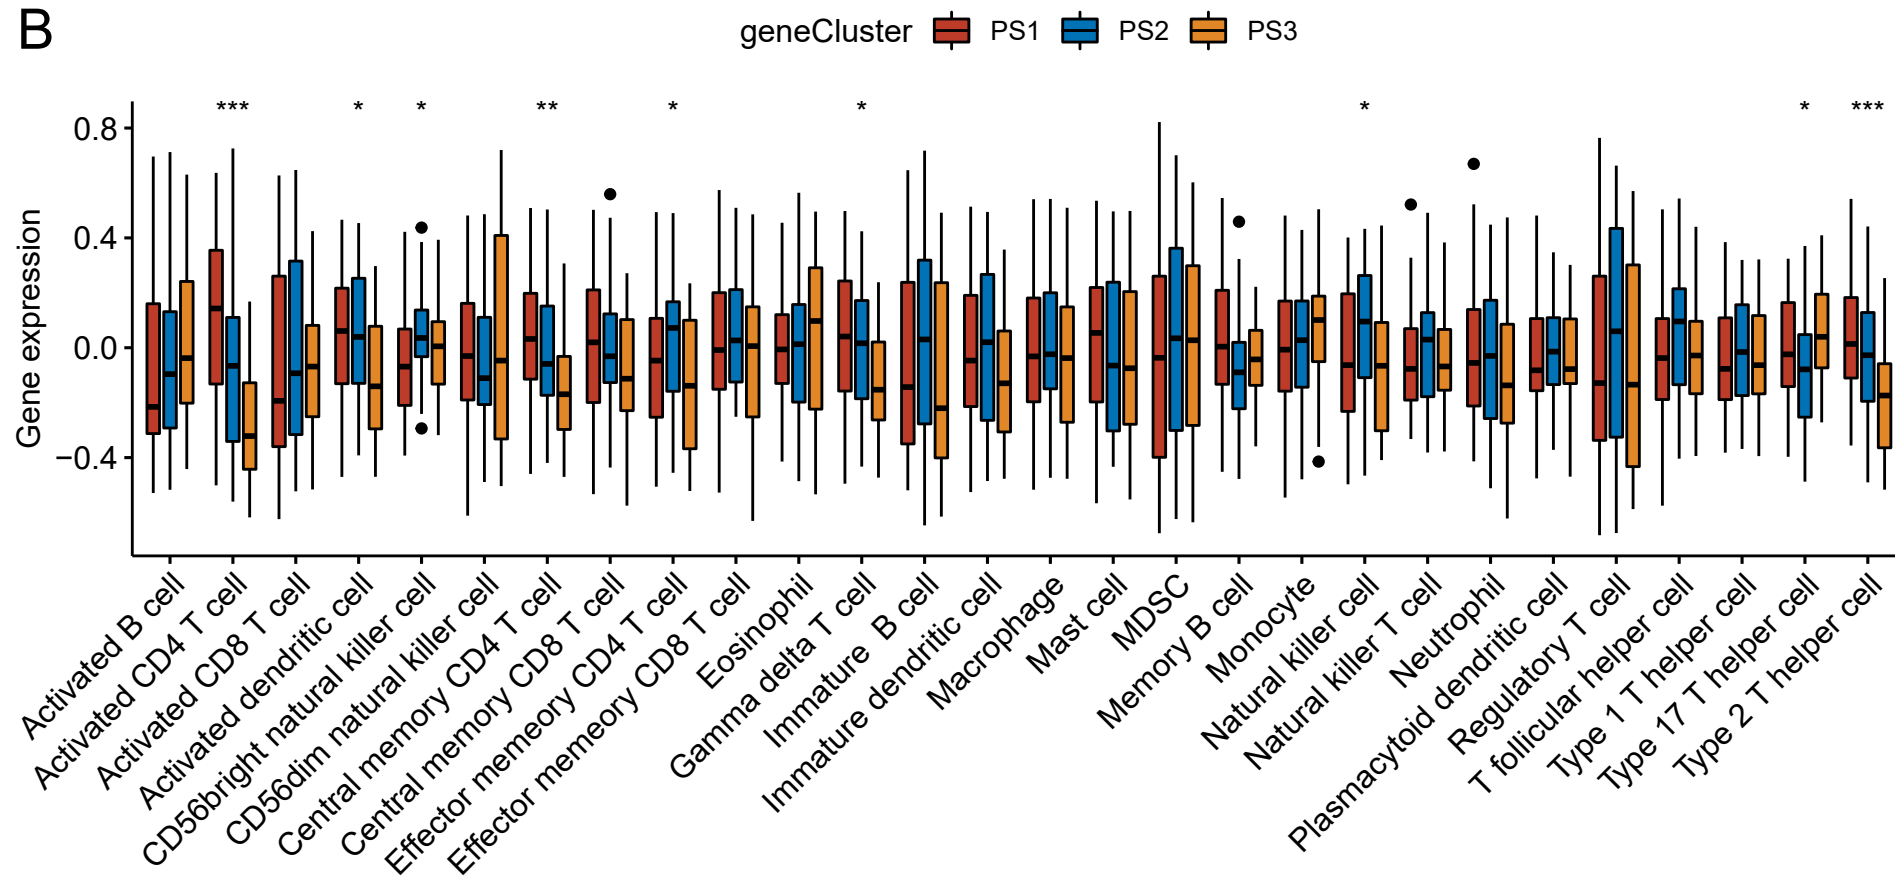

Supplement: s1 [file s1]

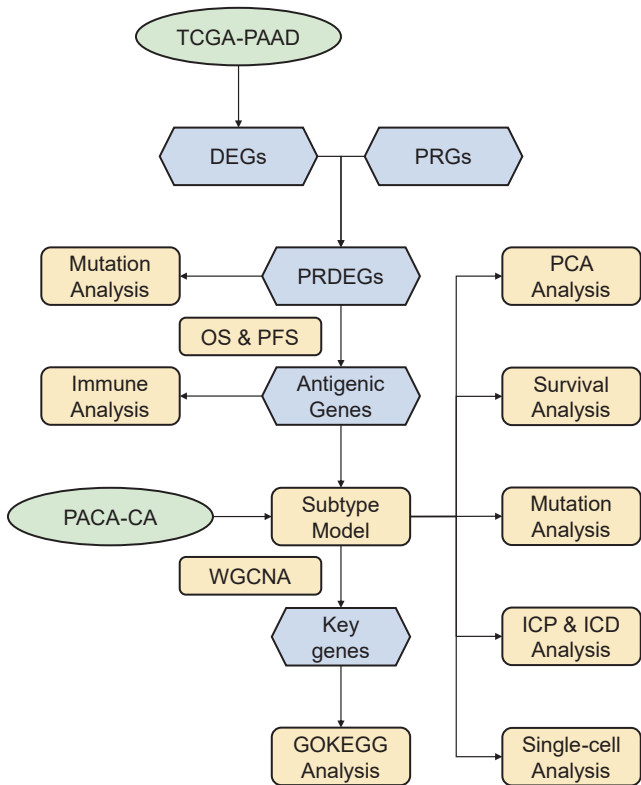

Supplement: s1 [file s1]
